# Supplementary material for: Using a 31-Gene Expression Profile Test to Stratify Patients with Stage I–II Cutaneous Melanoma According to Recurrence Risk: Update to a Prospective, Multicenter Study
Source: MDPI journal article supplement (doi:10.3390/cancers14041060), 2022-02-19
Supplement: s1 [file s1]

## Supplementary Materials

# Using a 31-Gene Expression Profile Test to Stratify Patients with Stage I–II Cutaneous Melanoma According to Recurrence Risk: Update to a Prospective, Multicenter Study

Sebastian Podlipnik, Aram Boada, Jose L. López-Esteban, Manuel M. Martín-González, Pedro Redondo, Brian Martin, Ann P. Quick, Christine N. Bailey, Sarah J. Kurley, Robert W. Cook and Susana Puig

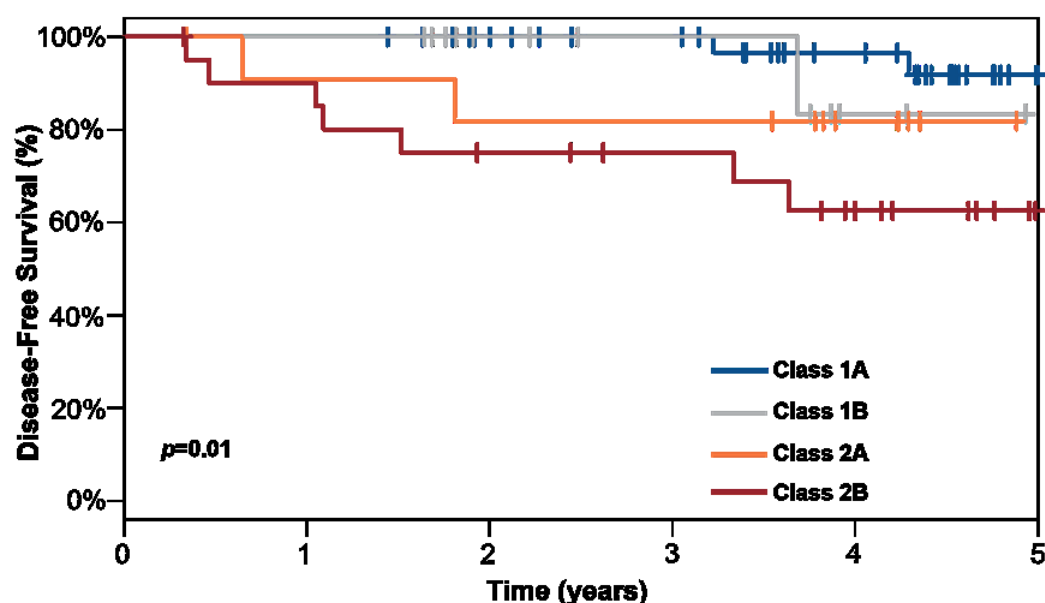

| Population           | 3-yr DFS (95%CI)   | Recurrence Rate, % (n/N) |
|----------------------|--------------------|--------------------------|
| Class 1A<br>(N = 40) | 100% (100-100%)    | 5.0% (2/40)              |
| Class 1B<br>(N = 13) | 100% (100-100%)    | 7.7% (1/13)              |
| Class 2A<br>(N = 12) | 81.8% (61.9-100%)  | 16.7% (2/12)             |
| Class 2B<br>(N = 21) | 75.0% (58.2-96.6%) | 33.3% (7/21)             |

**Figure S1.** The 31-GEP stratifies patients by 3-year disease-free survival (DFS) when analyzed by 31-GEP subclass. CI: confidence interval.

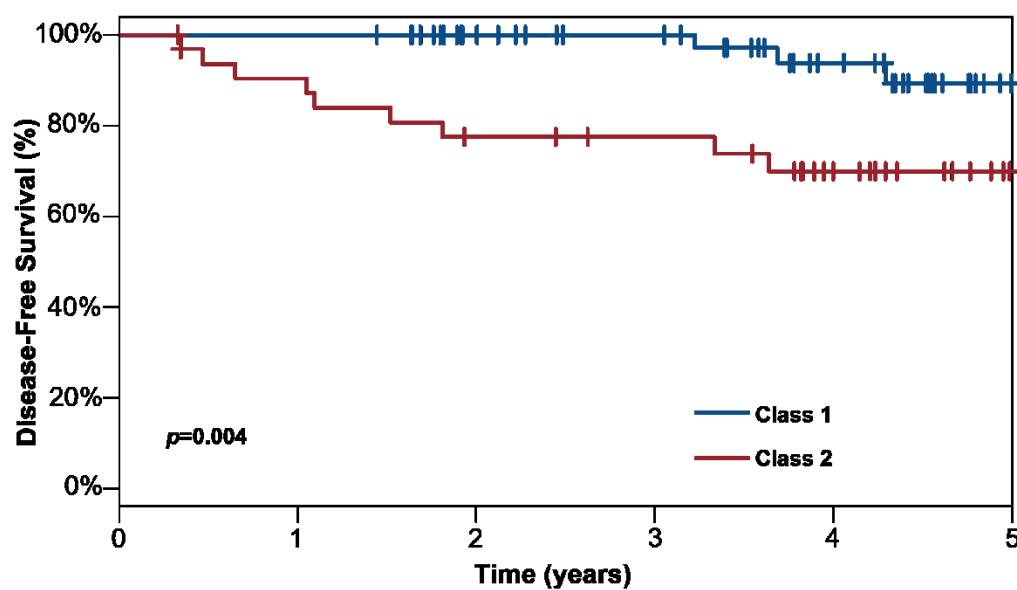

| Population       | 3-yr DFS (95%CI)   | Recurrence Rate, % (n/N) |
|------------------|--------------------|--------------------------|
| Class 1 (N = 53) | 100% (100-100%)    | 5.7% (3/53)              |
| Class 2 (N = 33) | 77.5% (64.1-93.7%) | 27.3% (9/33)             |

**Figure S2.** The 31-GEP stratifies patients by 3-year disease-free survival (DFS) when analyzed by 31-GEP main class.

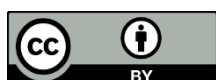

© 2022 by the authors. Licensee MDPI, Basel, Switzerland. This article is an open access article distributed under the terms and conditions of the Creative Commons Attribution (CC BY) license (<http://creativecommons.org/licenses/by/4.0/>).
